# Supplementary material for: Local adaptation in mainland anole lizards: Integrating population history and genome–environment associations
Source: PubMed Central journal article supplement (PMC6303772; doi:10.1002/ece3.4650), 2018-11-06

**Figure S1.** Histograms of corrected p-values from genome-environment association analyses using LFMM.

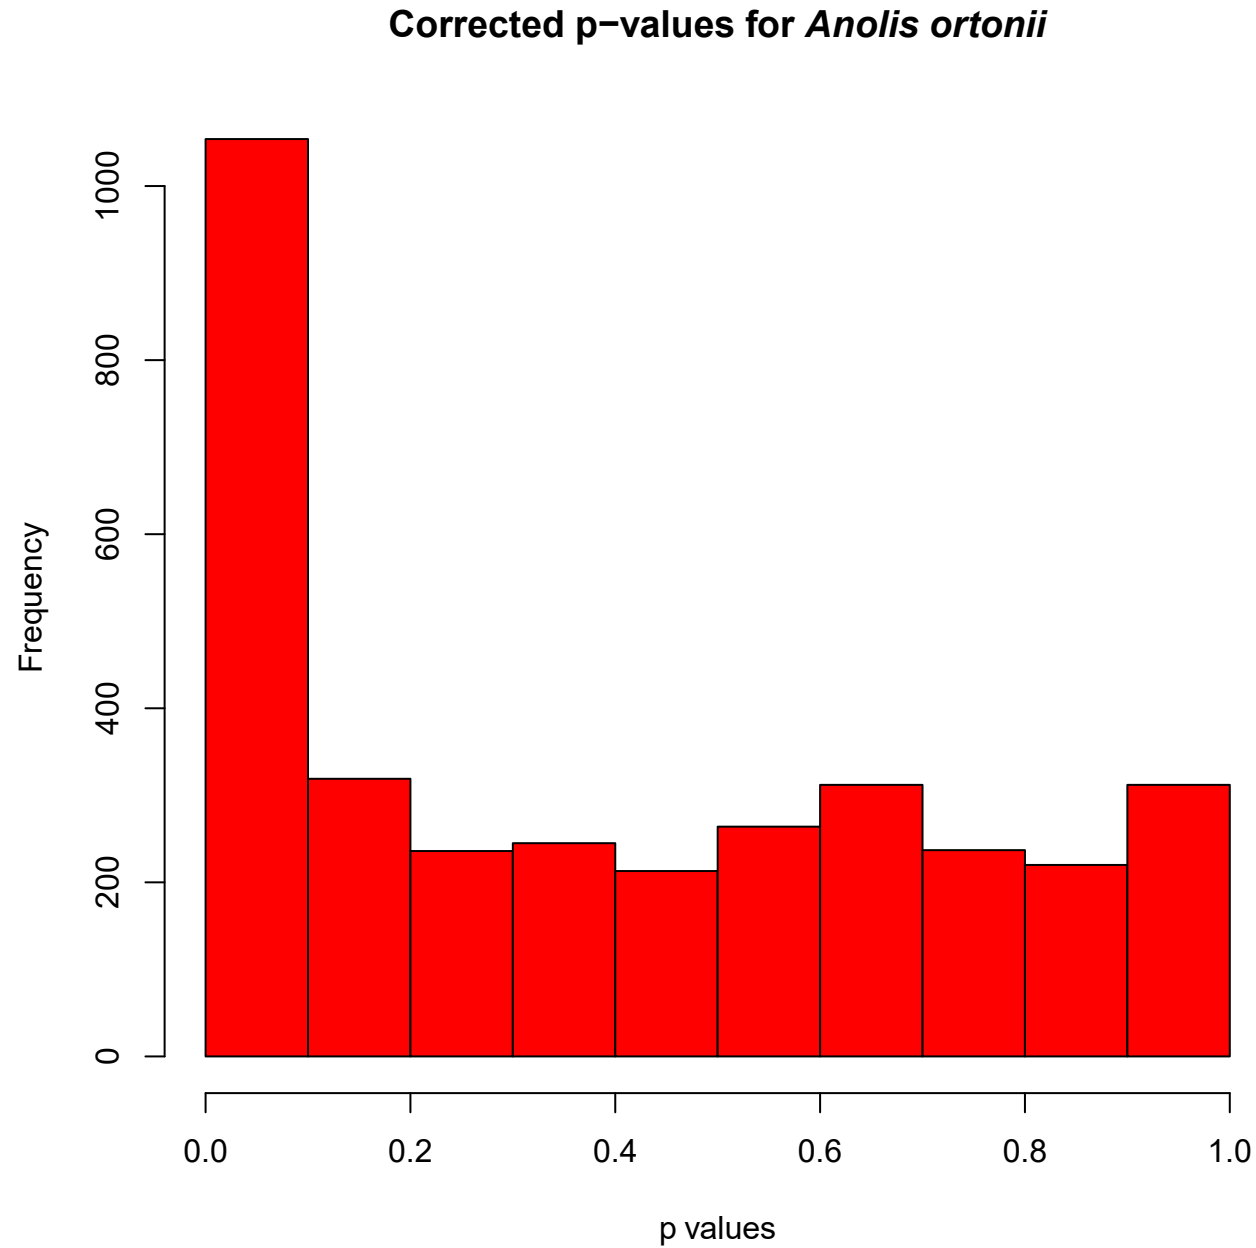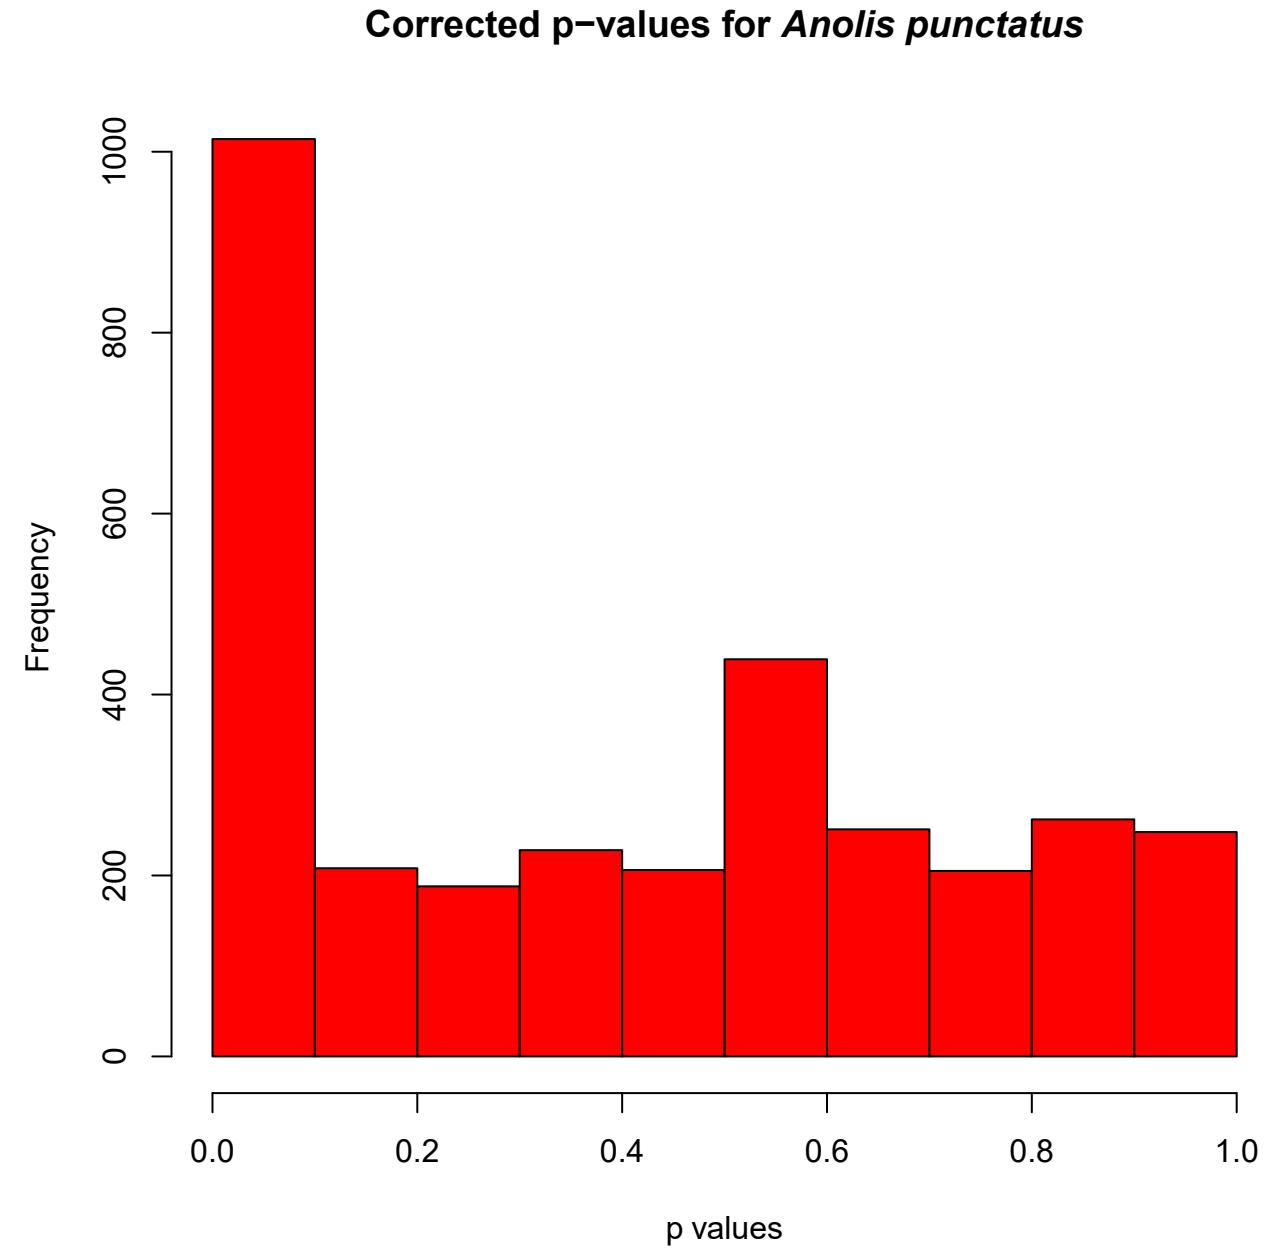

Supplement: ECE3-8-11932-s001.pdf [file ECE3-8-11932-s001.pdf]
